# Supplementary material for: SPIN (v1.0): A Spontaneous Synthetic Tropical Cyclone Model Empowered by NeuralGCM for Hazard Assessment
Source: Copernicus journal article supplement (doi:10.5194/egusphere-2025-5540), 2026-01-14
Supplement: Supplementary file 1 [file egusphere-2025-5540-supplement.pdf]

Supporting Information for

# **A Spontaneous Synthetic Tropical Cyclone Model Empowered by NeuralGCM for Hazard Assessment**

Yurong Gao<sup>1</sup>, Dazhi Xi<sup>1</sup>

<sup>1</sup> Department of Earth and Planetary Sciences, The University of Hong Kong, Hong Kong, China

## **Contents of this file**

1. Figure S1
2. Figure S2
3. Figure S3
4. Figure S4
5. Table S1
6. Table S2

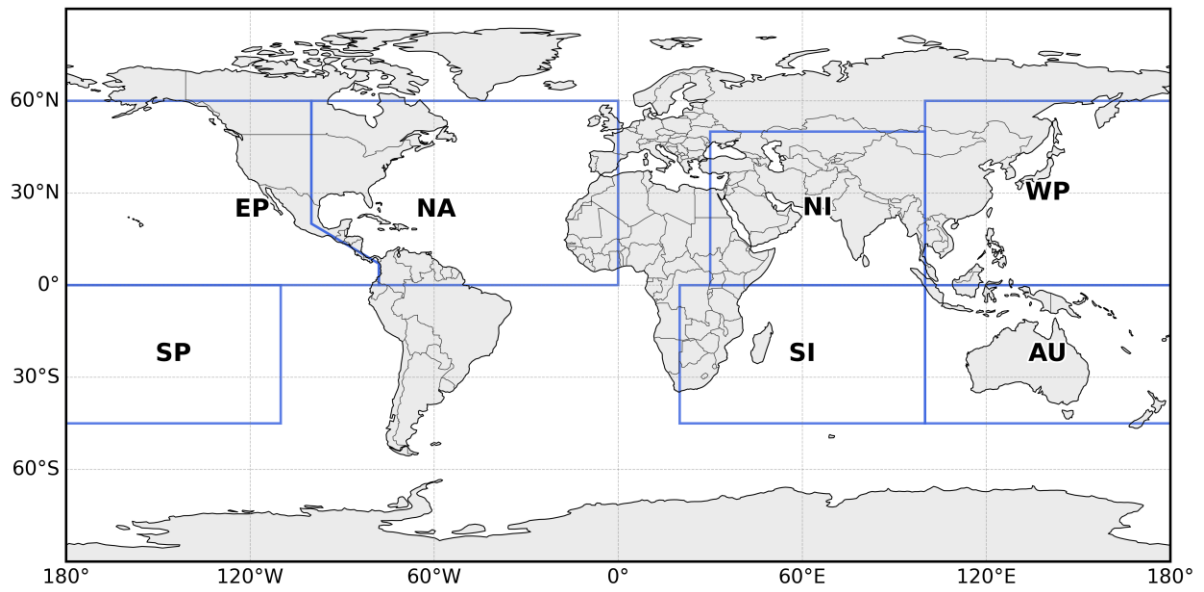

**Figure S1.** Basin boundaries as defined in this study.

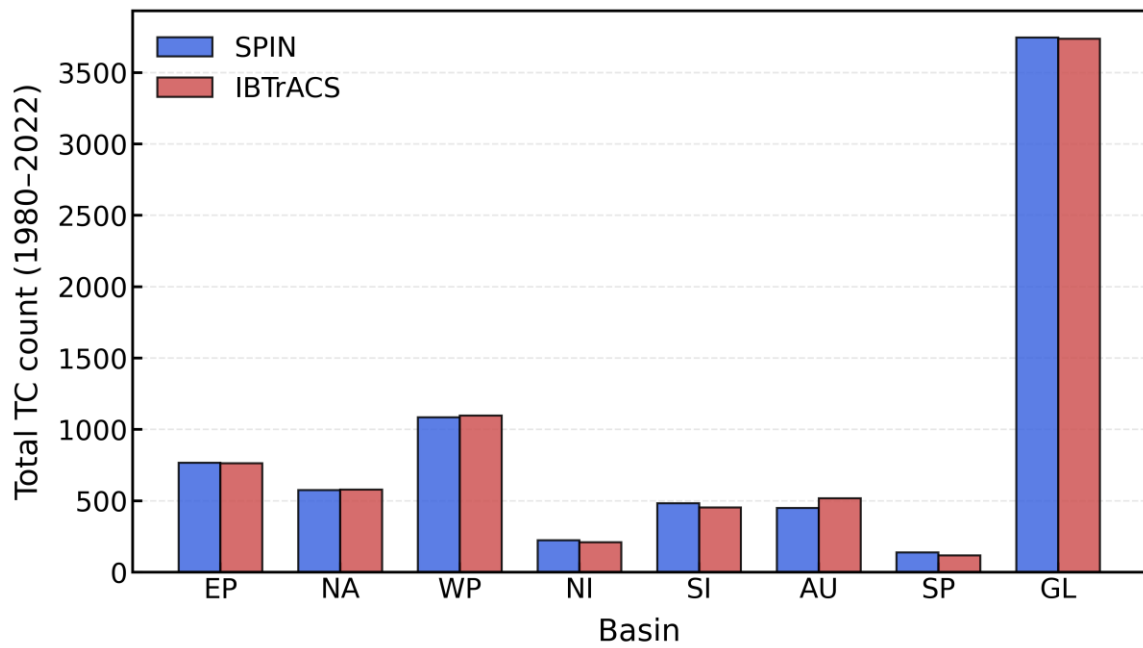

**Figure S2.** Comparison of total tropical cyclone (TC) counts from 1980–2022 between IBTrACS (red) and the 14-member SPIN ensemble mean (blue) across basins.

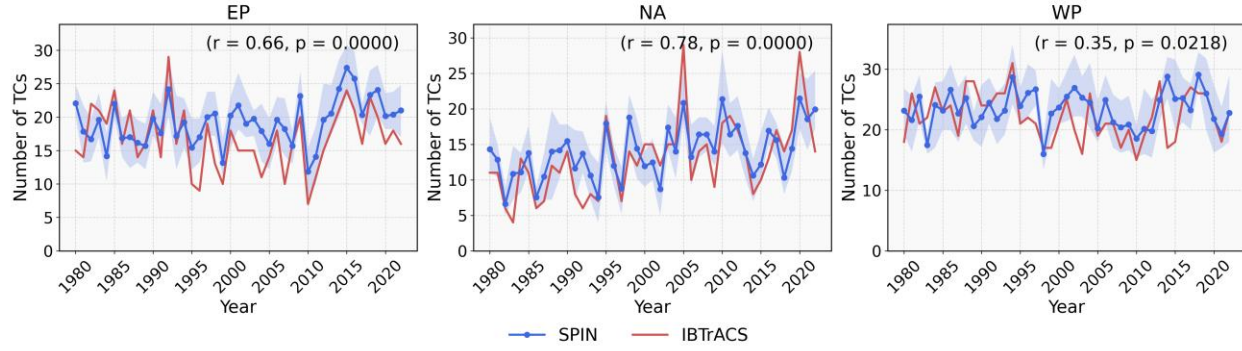

**Figure S3.** Interannual variability of TC counts by basin during June–December for 1980–2022. The blue line shows the ensemble mean of 14-member SPIN simulations initialized in early April at 6-hour intervals, with shading indicating the 10th–90th percentile range, and observations are shown in red. Pearson correlation coefficients (with significance levels) are reported in the upper-right of each panel.

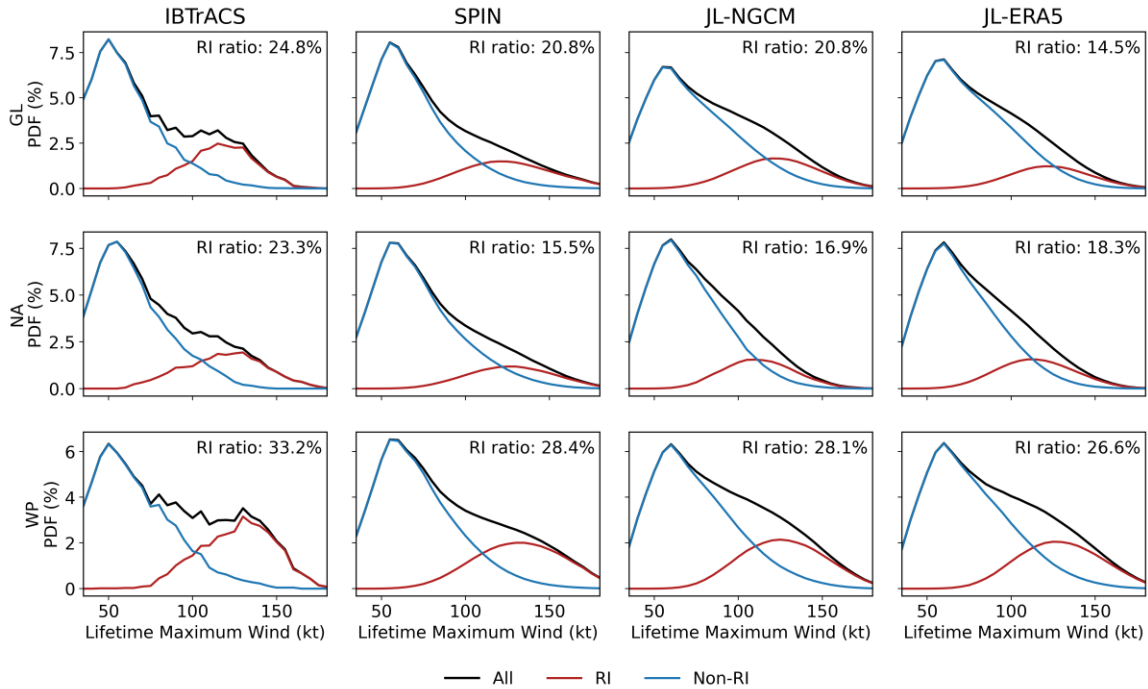

**Figure S4.** Distributions of TC lifetime maximum intensity (LMI) for rapid intensification (RI) and non-RI cases (1980–2022). Columns show IBTrACS, SPIN ensemble mean, JL23-downscaled NeuralGCM, and JL23-downscaled ERA5. For both JL-downscaled NeuralGCM and ERA5, the number of TCs is obtained by sub-sampling the downscaling events to match the number of observed events. Rows correspond to GL, NA, and WP basins. RI ratios are given in the upper-right of each panel.

| Basin | Model   | $D_{KL}(M \parallel O)$ | ACDFs  |
|-------|---------|-------------------------|--------|
| GL    | SPIN    | 0.029                   | -1.207 |
|       | JL-ERA5 | 0.034                   | -1.009 |
|       | JL-NGCM | 0.026                   | -1.071 |
| NA    | SPIN    | 0.009                   | -3.353 |
|       | JL-ERA5 | 0.029                   | -3.133 |
|       | JL-NGCM | 0.035                   | -1.385 |
| WP    | SPIN    | 0.027                   | -0.853 |
|       | JL-ERA5 | 0.029                   | -1.355 |
|       | JL-NGCM | 0.027                   | -1.414 |

**Table S1.** Evaluation of model-simulated LMI (1980-2022) using the Kullback–Leibler (KL) divergence  $D_{KL}(M \parallel O)$  and the area between cumulative distribution functions (ACDFs) of the model and observations, shown across basins for SPIN, JL23-downscaled ERA5, and JL23-downscaled NeuralGCM.

| Basin | Model             | $D_{KL}(M \parallel O)$ | ACDFs | ACDFs (0-5 day) |
|-------|-------------------|-------------------------|-------|-----------------|
| EP    | SPIN              | 0.032                   | 1.17  | 0.31            |
|       | IBTrACS (uniform) | 0.031                   | 0.46  | 0.47            |
| NA    | SPIN              | 0.018                   | 0.86  | -0.06           |
|       | IBTrACS (uniform) | 0.019                   | 1.35  | 0.28            |
| WP    | SPIN              | 0.007                   | -0.33 | -0.02           |
|       | IBTrACS (uniform) | 0.027                   | 0.61  | 0.48            |
| NI    | SPIN              | 0.056                   | 0.57  | -0.05           |
|       | IBTrACS (uniform) | 0.168                   | 5.44  | 0.63            |
| SI    | SPIN              | 0.021                   | 1.26  | 0.22            |
|       | IBTrACS (uniform) | 0.055                   | 2.06  | 0.50            |
| AU    | SPIN              | 0.014                   | -0.53 | -0.24           |
|       | IBTrACS (uniform) | 0.031                   | 1.36  | 0.25            |
| SP    | SPIN              | 0.062                   | -0.79 | -0.18           |
|       | IBTrACS (uniform) | 0.073                   | 2.89  | 0.27            |

**Table S2.** Evaluation of model-simulated TC inter-genesis dates (1980-2022) using the Kullback–Leibler (KL) divergence  $D_{KL}(M \parallel O)$ , and the area between cumulative distribution functions (ACDFs) of the model and observations for all bins and 0-5day bin. Results are shown across basins for SPIN and IBTrACS with uniformly sampled dates.
